1 High laboratory mouse pre-weaning mortality associated with litter overlap, advanced mother  
2 age, small and large litters

3

4

5 Gabriela Munhoz Morello<sup>1,2</sup>, Jan Hultgren<sup>3</sup>, Sara Capas-Peneda<sup>1,2</sup>, Marc Whiltshire<sup>4</sup>, Aurelie  
6 Thomas<sup>5</sup>, Hannah Wardle-Jones<sup>5</sup>, Sophie Brajon<sup>1,2</sup>, Colin Gilbert<sup>4</sup>, I. Anna S. Olsson<sup>1,2</sup>

7

8

9

10 <sup>1</sup>Laboratory Animal Science, IBMC-Institute of Molecular and Cellular Biology, University of  
11 Porto, Porto Portugal

12 <sup>2</sup>i3S – Institute for Investigation and Innovation in Health, University of Porto, Porto, Portugal

13 <sup>3</sup>Department of Animal Environment and Health, Swedish University of Agricultural Sciences,  
14 Skara, Sweden

15 <sup>4</sup>Babraham Institute, Babraham, Cambridge, United Kingdom

16 <sup>5</sup>Wellcome Sanger Institute, Hinxton, Cambridgeshire, United Kingdom

17

18 \*Corresponding author

19 E-mail: [gabriela.morello@i3s.up.pt](mailto:gabriela.morello@i3s.up.pt) (GMM)

## 20 **Abstract**

21 High and variable pre-weaning mortality is a persistent problem among the main mouse strains  
22 used in biomedical research. If a modest 15% mortality rate is assumed across all mouse strains  
23 used in the EU, approximately 1 million more pups must be produced yearly to compensate for  
24 those which die. A few environmental and social factors have been identified as affecting pup  
25 mortality, but optimizing these factors does not cease the problem. This study is the first large  
26 study to mine data records from 219,975 pups from two breeding facilities to determine the major  
27 risk factors associated with mouse pre-weaning mortality. It was hypothesized that litter overlap  
28 (i.e. the presence of older siblings in the cage when new pups are born), a recurrent social  
29 configuration in trio-housed mice, is associated with increased newborn mortality, along with high  
30 mother age, large litter size, as well as a high number and age of older siblings in the cage. The  
31 estimated probability of pup death was two to seven percentage points higher in cages with  
32 compared to those without litter overlap. Litter overlap was associated with an increase in  
33 percentage of litter losses of 19% and 103%, respectively, in the two breeding facilities. Increased  
34 number and age of older siblings, high mother age, small litter size (less than four pups born) and  
35 large litter size (over 11 pups born) were associated with increased probability of pup death.  
36 Results suggest that common social cage configurations at breeding facilities are dangerous for the  
37 survivability of young mouse pups. The underlying mechanisms and strategies to avoid these  
38 situations should be further investigated.

## 39 **Introduction**

40 High pre-weaning mortality of laboratory mice is a major welfare and economic problem affecting  
41 mouse breeding at academic and industrial laboratories worldwide. Previous studies report pup

42 mortalities from less than 10% [1] to as high as 49% [2] for C57BL/6 mice, one of the most  
43 commonly used mouse strains. Despite the general ongoing effort to reduce the number of animals  
44 in research and improve their welfare according to the 3R principle for research[3], high pre-  
45 weaning mortality rates persist and very little systematic research has been done to identify causes  
46 of poor survival. Data from experimental and observational studies conducted by the authors of  
47 this work at different breeding facilities in three different countries revealed that 32% of 344 litters  
48 (retrospective analysis, Germany[4]), 33% of 55 litters (experimental data, U.K.[5]), and 18% of  
49 510 litters (experimental data, Portugal[6]) were completely lost, with the overall mortality varying  
50 from 25[6] to 52% in trio-bred mice[5] in the experimental studies. If a modest level of 15%  
51 mortality is assumed across all mouse strains, at least 1 million more mice must be produced every  
52 year just in the European Union (EU) to compensate for pups that die before they can be used in  
53 science (estimate based on the number of mice used yearly in research in the EU; European  
54 Commission 2020 [7]). Such losses are contrary to the 3R principle that is now explicit in EU  
55 legislation[8] and incur extra breeding costs of €5-8 million yearly. Several environmental,  
56 management and behavioural factors have been linked to pup mortality, such as thermal  
57 environment of the cage, level of parental care, mother age, litter size, provision of nest material,  
58 and cage manipulation [5,9–13], but manipulating these factors has not as yet eliminated the  
59 mortality problem. Recently, we identified the presence of older litter mates in the cage when a  
60 new litter is born (litter overlap) as a major factor affecting pup survival [5]. In a study with 55  
61 litters of C57BL/6 mice (n=521 pups) housed in trios [5], a 2.3 fold increase was found in litter  
62 loss in cages where older littermates were present, compared to trio cages with no older littermates.  
63 Litter overlap happens in both trio (two adult females and one male) and pair (one adult female  
64 and one male) housing, which are the most common configurations in mouse breeding. Although

65 litter overlap is more frequent in trios due to the presence of two breeding females, the number of  
66 pups weaned per litter is not reduced in trios compared to pairs, while trios wean more pups per  
67 cage [14]. One possible reason for this is that litter overlap in pair cages affects pup mortality more  
68 severely as compared to trio cages. In pair cages, litter overlap occurs when the only female of the  
69 cage gives birth before weaning her previous litter. In these cases, the age gap between litters  
70 becomes large, which might be especially detrimental to pup survival.

71 Previous research into factors affecting laboratory mouse reproduction used primarily  
72 experimental study approaches, where the sample size was small and animal management and data  
73 collection differed from standard practice in a breeding facility. With the increasing use of  
74 breeding management software, it is now possible to use much larger datasets representing the  
75 reality of practical laboratory mouse breeding. In this study, a dataset of 219,975 pups was  
76 analysed from two different collaborating breeding facilities in the UK (58,692 and 161,283 pups),  
77 by modelling the risk of a newborn mouse dying as a function of the age and number of older  
78 littermates, as well as of mother age. It was hypothesized that litter overlap is a recurrent social  
79 configuration and that the risk of pup mortality increases with litter overlap, high mother age, large  
80 litter size, as well as a high number and age of older siblings in the cage.

## 81 **Material and methods**

### 82 **Data retrieval**

83 Historical mouse breeding data was provided by two collaborating facilities. Therefore, this study  
84 did not involve any type of animal manipulation, observation, or use. Mouse breeding in the  
85 collaborating facilities was performed in line with the UK Animals (Scientific Procedures) Act of  
86 1986.

87 Mouse breeding data were made available by two collaborating breeding facilities (C1, the  
88 Babraham Institute and C2, the Wellcome Sanger Institute). Historical production data were  
89 downloaded directly from their breeding management software (MCMS, Mouse Colony  
90 Management System, the Wellcome Sanger Institute Data Centre). C1 provided data from January  
91 2014 to October 2018, and C2 provided data from January 2010 to March 2019. The datasets  
92 contained information on litter identity, breeding adults' identities, date of birth, date of death,  
93 number of pups born and number of pups weaned.

## 94 **Animals, housing, and management**

95 The original dataset contained a total of 34,949 C57BL/6 litters and 219,975 pups. All mice were  
96 housed in trios (two females and one male) in individually ventilated cages (IVC). Details on  
97 animals, housing, and management are shown in Table 1.

98 **Table 1. Animal, housing, and management characteristics for the collaborating animal**  
99 **facilities.**

|                              | <b>The Babraham Institute, C1</b>                                                          | <b>The Wellcome Sanger Institute, C2</b>                                                      |
|------------------------------|--------------------------------------------------------------------------------------------|-----------------------------------------------------------------------------------------------|
| <b>Mouse Strain</b>          | C57BL/6Babr                                                                                | C57BL/6NTac                                                                                   |
| <b>Housing configuration</b> | Trios                                                                                      | Trios                                                                                         |
| <b>Type of cages</b>         | IVC <sup>a</sup> Tecniplast GM500, transparent polysulphone                                | IVC <sup>a</sup> Tecniplast GM500, transparent polysulphone and Tecniplast Sealsafe 1284L     |
| <b>Ventilation rate</b>      | 65 to 75 air changes/hour                                                                  | 60 air changes/hour                                                                           |
| <b>Air handling unit</b>     | Tecniplast DGM80 and DGM160                                                                | Tecniplast TouchSLIMLine™                                                                     |
| <b>Bedding</b>               | 5 mm deep soft-wood-flake bedding (ECO6, Datesand group, Manchester, UK)                   | 175 g of Aspen Chips (B&K Universal Ltd, Peninsula Plaza, Singapore)                          |
| <b>Nest</b>                  | 7 g of white paper rolls (Enrich-n <sup>o</sup> Nest, Datesand group, Manchester, ENG, UK) | 25 mm square Nestlet (Datesand group, Manchester, UK) derived from pulped cotton virgin fibre |
| <b>Enrichment</b>            | Tecniplast Mouse Pouch Loft, a second level flooring within the cage                       | One cardboard bio-tunnel per cage                                                             |

|                                        |                                                                                                                                                                   |                                                                                                                      |
|----------------------------------------|-------------------------------------------------------------------------------------------------------------------------------------------------------------------|----------------------------------------------------------------------------------------------------------------------|
| <b>Water</b>                           | <i>Ad libitum</i> , sterilized through reverse osmosis and provided through automatic drinking valves (Edstrom A160/QD2, Avidity Science LLC, Waterford, WI, USA) | <i>Ad libitum</i> , triple filtered, provided in flash sterilized acrylic bottles with stainless steel drinking caps |
| <b>Food</b>                            | <i>Ad libitum</i> in the form of standard 9.5 mm diameter dry pellets (CRM(P), Special Diets Services, Witham, Essex, UK)                                         | <i>Ad libitum</i> in the form of standard 10.5 mm diameter dry pellets (SAFE R03-10, Augy, France)                   |
| <b>Cage change routine</b>             | Cages changed once every second week; cages with large litters sometimes cleaned every week                                                                       | Cages assessed once a week and changed if needed                                                                     |
| <b>Room temperature (target)</b>       | 20°C to 21°C                                                                                                                                                      | 19°C to 23°C                                                                                                         |
| <b>Room relative humidity (target)</b> | 50%                                                                                                                                                               | 45% to 65%                                                                                                           |
| <b>Light schedule</b>                  | 12 hours light (7:00-19:00) and 12 hours dark                                                                                                                     | 12 hours light (7:30-19:30) and 12 hours dark                                                                        |
| <b>Weaning age (target)</b>            | 21 days                                                                                                                                                           | 19 to 23 days; male pups were euthanized before weaning                                                              |
| <b>Breeding start age (target)</b>     | 8 to 9 weeks                                                                                                                                                      | 6 to 9 weeks                                                                                                         |
| <b>Retirement age (target)</b>         | 24-32 weeks; longer if productive                                                                                                                                 | 24 weeks, or after 3 poor litters, or after 5 or 6 successful litters                                                |
| <b>Pup counting routine</b>            | Pups are counted once between their birth and day 7 pp with minimal handling                                                                                      | Pups are counted whenever cages are cleaned. Pups less than five 5 d old are left undisturbed (not counted)          |

100 <sup>a</sup>IVC=Individually ventilated cage

## 101 **Statistical analysis**

102 Data were collected from 58,692 pups in 9,261 litters and 161,283 pups in 25,688 litters from C1  
103 and C2, respectively. Required information was retrieved using Scilab (version 6.0.1, Scilab  
104 Enterprises, Rungis, France), resulting in one data line per pup. A total of 11% (C1) and 21% (C2)  
105 of the data provided was excluded, mainly due to incongruent data records, implausibly large litters  
106 (more than 13 pups, unless confirmed as correct), unreliable information on number and age of

107 older pups in the cage, or missing information. Male pups at C2 euthanized at day 7 pp or later  
108 were coded as surviving. Litters with males euthanized before day 7 pp were excluded.

109 Pup mortality before weaning was coded as 0 (survived) or 1 (died) and used as the dependent  
110 variable. Environmental and social factors were considered as risk factors for pup death.  
111 Independent variables representing environmental factors considered for analysis were  
112 Collaborator (C1 or C2), Season (Winter, Spring, Summer, Fall), Month (as an alternative  
113 predictor to Season), Weekday, and Year, while independent variables for social risk factors  
114 included Mother Age (continuous), Father Age (continuous), Litter Size (number of pups born;  
115 continuous), litter Overlap (whether or not older siblings were present at the time of birth of the  
116 focus litter; no or yes), Sibling Number (number of older pups in the cage at the time of birth of  
117 the focus litter; continuous) and Sibling Age (age of the older siblings; continuous).

118 The risk of pup death was modelled by mixed logistic regression, using the GLIMMIX procedure  
119 in SAS (2018 University Edition, SAS Institute Inc., Cary, NC, USA). Multicollinearity among  
120 independent variables was checked by using the variance inflation factor (VIF) and regressing  
121 each independent variable on the others. As a consequence, Year, Month, and Father Age were  
122 excluded from the analysis.

123 Data of C1 and C2 were combined together and two separate models were constructed; one model  
124 using data for all pups, including those with and without litter overlap, and another model for pups  
125 with litter overlap only. In both models, litter identity was included as a random effect to account  
126 for clustering. The models were built by adding one independent variable of interest (Mother Age,  
127 Litter Size, Overlap (first model) or Sibling Number and Sibling Age (second model)) at a time in  
128 a stepwise process with bidirectional elimination. Independent variables with  $P \leq 0.05$  were kept  
129 in the model. Weekday, Season, and Collaborator were then tested one at a time as confounders,

130 followed by possible interactions and higher order terms. Least-squares means of Weekday,  
131 Season, and Overlap were examined and compared among different variable levels.

## 132 **Results**

133 The percentage of pups dying before weaning was 39% at C1 and 14% at C2, while the mean  
134 number of Litter Size was 7.6 pups born/litter in both collaborators. In 42% of the C1 litters and  
135 78% of the C2 litters no pups died. The percentage of litters with at least 90% death rate was 28%  
136 at C1 and 9% at C2. Approximately 50% and 57% of the litters were born with the presence of  
137 older siblings in the cage (litter overlap) in C1 and C2, respectively.

138 The first model (all pups) contained the variables Collaborator, Season, Weekday, Mother Age,  
139 Litter Size and Overlap. The second model (pups with litter overlap) contained variables  
140 Collaborator, Season, Weekday, Mother Age, Litter Size, Sibling Number, and Sibling Age.  
141 Collaborator interacted significantly with all the independent variables in both models, except  
142 Mother Age in the second model. Therefore, results for C1 and C2 are presented separately. Sibling  
143 Number interacted significantly with Sibling Age, while Litter Size affected pup death probability  
144 in a quadratic fashion in both models. Model details are available in S1 and S2 Tables.

145 The estimated probability of pup death was seven (C1) and two (C2) percentage points higher ( $P$   
146  $< 0.01$ ) in cages with the presence of older siblings compared to cages without an older litter (Fig  
147 1A and 1B). At C1, 31% of the overlapped and 26% of the non-overlapped litters had a total litter  
148 loss (all pups dying, Fig 1C), whereas at C2, the corresponding figures were 12% and 6% (Fig  
149 1D).



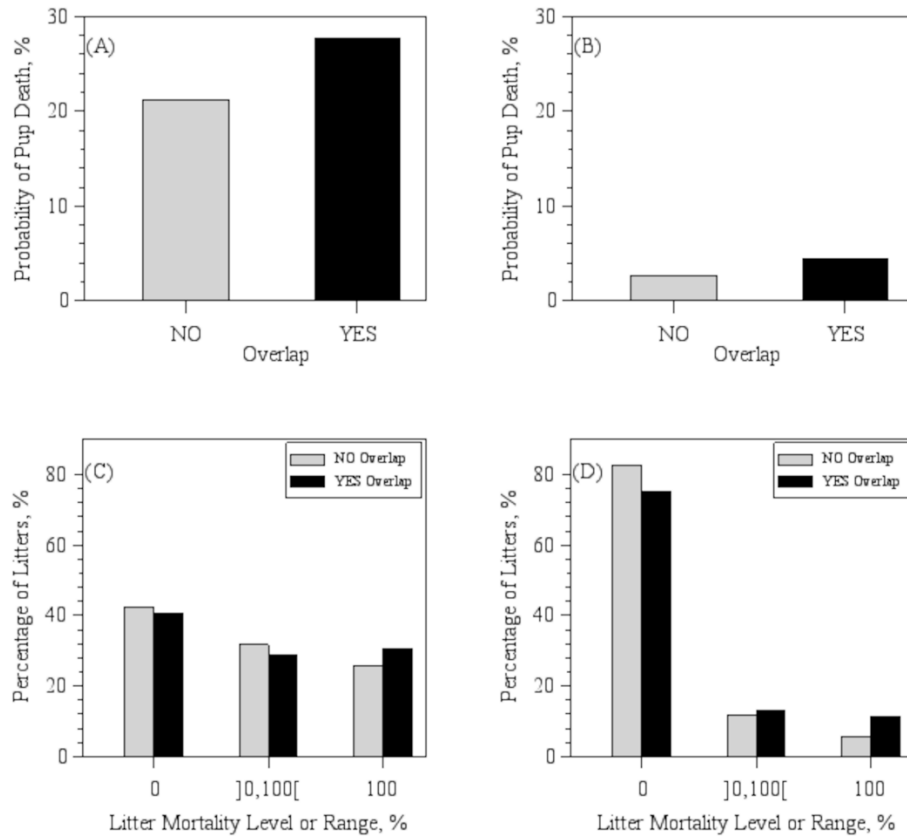

150

151 **Fig 1. Probability of pup death and litter mortality distribution.** Probability of pup death in  
152 litters without (NO) or with (YES) the presence of older siblings in the cage (litter overlap) at (A)  
153 C1, the Babraham Institute, and (B) C2, the Wellcome Institute, based on least-square means.  
154 Percentage of litters born with litter overlap by category of pre-weaning mortality at (C) C1 and  
155 (D) C2, based on raw data. Numbers within brackets in the x-axis designate lower (left side) and  
156 upper (right side) limits of mortality range. An open bracket next to a number designates a non-  
157 inclusive limit.

158 The predicted probability for a pup to die as a function of Mother Age, Litter Size, Sibling Age,  
159 and Sibling Number is illustrated by Figs 2 and 3. Increased Mother Age, Sibling Number, and  
160 Sibling Age were associated ( $P < 0.01$ ) with an increase in the probability of pups dying at both  
161 C1 and C2 (Figs 2 and 3).

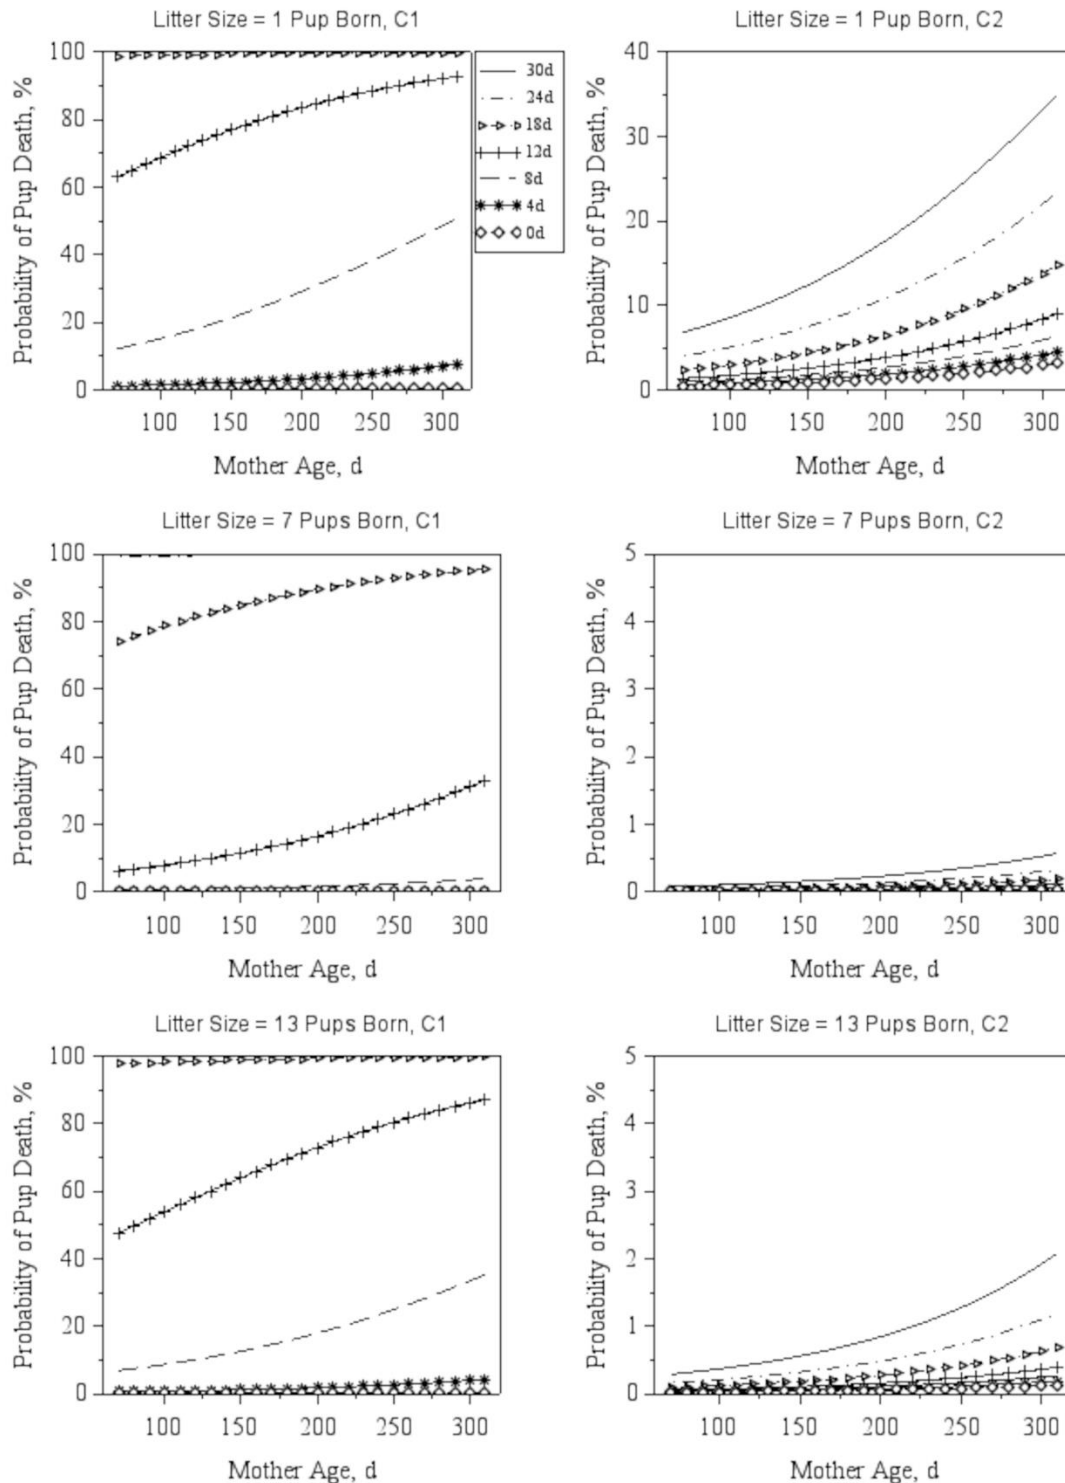

162

163 **Fig 2. Probability of pup death by Mother Age and Sibling Age.** Predicted probabilities (least-

164 squares means) of a pup to die as a function of Mother age for three distinct levels of Litter Size

165 (number of pups born), at C1, the Babraham Institute and C2, the Wellcome Sanger Institute. Each

166 line corresponds to predictions for a specific value of Sibling Age, as depicted in the legend next  
167 to the top left graph. Predictions were obtained while assuming six older pups in the cage, the most  
168 recurrent Weekday (Thursday) and the most common Season (Spring) in the combined dataset.

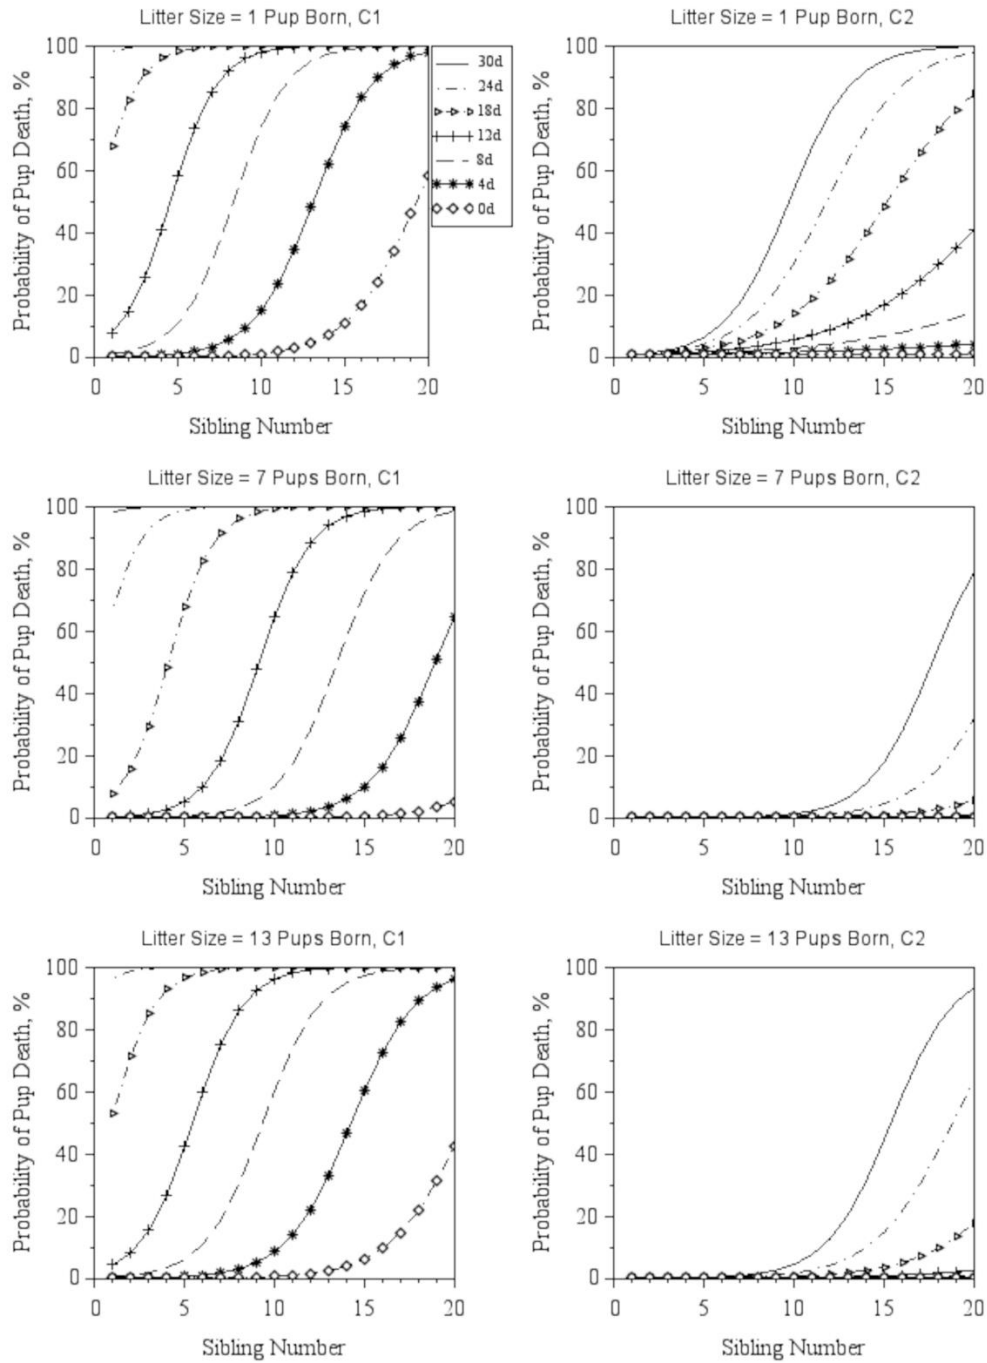

169

170 **Fig 3. Probability of pup death by Sibling Number and Sibling Age.** Predicted probabilities  
171 (least-squares means) of a pup to die as a function of Sibling Number (number of older pups in the  
172 cage at the birth of the focal litter) for three distinct levels of Litter Size (number of pups born), at  
173 C1, the Babraham Institute and C2, the Wellcome Sanger Institute. Each line corresponds to  
174 predictions for a specific value of Sibling Age, as depicted in the legend next to the top left graph.  
175 Predictions were obtained while assuming six older pups in the cage, the most recurrent Weekday  
176 (Thursday) and the most common Season (Spring) in the combined dataset.  
177 Pup death was associated with Litter Size in a quadratic fashion in both collaborators ( $P < 0.01$ ).  
178 For all combinations of Mother Age and Sibling Age, the risk of death was nearly at its minimum  
179 around a litter sizes of 6-10 pups (mean litter size at birth for overlapped data:  $7.3 \pm 2.6$  pups).  
180 Although Weekday and Season were not added to the models as variables of interest, these factors  
181 turned out to be confounders to the models ( $P < 0.01$ ). The probability of death consistently  
182 decreased towards the end of the week at both collaborators, while the effect of Season lacked a  
183 consistent pattern between collaborators (available in S1 Fig). C1 was able to provide records on  
184 cage cleaning dates per Weekday for the period of 17 months (April 2018 to November 2019) for  
185 the colony. Cage change events also peaked in the beginning of the week and were lower towards  
186 the end of the week (available in S2 Fig).

## 187 **Discussion**

188 Neonatal mortality is a large problem in laboratory mouse breeding and improving pup survival is  
189 a key to improve the efficiency and sustainability of producing laboratory mice while complying  
190 with the 3R principle[8]. Here, we present the first large scale study of management, environmental  
191 and animal factors affecting pup survival based on data from over 200,000 C57BL/6 pups born  
192 during a period of 5 to 10 years in two large mouse breeding facilities. The study indicates that

193 litter overlap, a social configuration which frequently occurs in trio-breeding cages, results in a 30  
194 to 60% increase in the probability of neonatal pup death. The higher the number and age of older  
195 siblings in the cage, the greater is the risk of neonatal pup death. The probability of pups to die in  
196 the presence of older siblings was also affected by mother age and litter size.

197 Irrespective of any mortality risks identified, the average litter mortality rates obtained both at C1  
198 (39%) and C2 (14%) were higher than what was previously reported for C57BL/6J mice (8% pre-  
199 weaning mortality[15] with pup counting at weaning and 3% mortality at three days pp[16] with  
200 pup number obtained from video-records). Litter mortality was higher in C1 compared to C2 and  
201 no differences were found between collaborators in the number of pups born per litter. Husbandry  
202 differences between C1 and C2 may contribute to the mortality difference between both institute  
203 as cage temperature, as well as nest and bedding amount and quality affect rodents' breeding  
204 performance[10–13]. An additional factor may be the practice of euthanizing male pups in C2.  
205 Euthanized males after seven days of age were considered as survivals, but this is an assumption  
206 and may have led to an underestimation of mortality. Finally, any differences in accuracy of data  
207 entry may have affected the results. C1 had a more consistent and early counting of pups than C2.  
208 Thus it is possible that C1 has a better accuracy in detecting the number of pups born compared to  
209 C2 where pups born could be underestimated, considering that most of deaths happen within 48h  
210 pp and dead pups often get cannibalized by the dam, thus not seen by the caretakers. Productivity  
211 differences either in pup survivability or in the actual number of pups born due to the distinct  
212 mouse sub-strains between C1 and C2 could also underlie the differences in overall mortality  
213 found between C1 and C2.

214 The found higher mouse pre-weaning mortality in trios with overlapped litters, i.e. litters born  
215 when an older litter was present, compared to non-overlapped litters is in agreement with previous

216 experimental findings. In outbred mice derived from the C57BL/6J, BALB/c, and DBA/1J strains,  
217 Schmidt et al. (2015)[17] found pup mortality to increase with increasing age gap between the  
218 litters sharing a cage at a specific time. Understanding why being born into a cage with an older  
219 litter is so dangerous requires information about events around pup death and the condition of dead  
220 and dying pups. Past research have frequently associated pup mortality with infanticide[17,18],  
221 assuming that cannibalized pups were killed before they were eaten. However, previous behavior  
222 studies conducted by the authors of this study revealed that infanticide precedes less than 15% of  
223 the cannibalism events[5,19] and that pups die primarily from other causes than direct killing.  
224 Litter asynchrony, which often leads to overlap, is likely to increase unequal competition for access  
225 to milk and parental care, trauma caused by trampling and stepping of newborns by the adults or  
226 the older siblings, and problems related with increased cage stocking density.

227 Early access to milk is essential for the survival of newborn pups. Measurements of pup energy  
228 losses due to metabolism between nursing bouts, extrapolated for a period of 24 hours, revealed  
229 that if pups did not receive milk during their first day of life, they would lose approximately 8%  
230 of their birth weight[20], which would likely reduce their chances of survival. The presence of  
231 older and consequently heavier, more developed and more mobile pups in the cage may have  
232 interfered with the access of the newborns to milk in general and specifically to steal the iron-rich  
233 milk that is present in higher concentrations during the first week of lactation[20]. Also, older and  
234 heavier siblings may be able to displace light newborn pups more easily from the dam's nipples,  
235 as compared to younger siblings. This could partly explain the interaction found in this work  
236 between the Number and the Age of Older Siblings in the cage, affecting pup death probability.

237 The presence of two litters in the cage has been demonstrated to increase parturition duration and  
238 affect parental behavior. Adults in trio cages with two litters were observed to care for their

239 newborn pups a total of 20% less time (all the three adults together) than adults with one single  
240 litter in the cage[5], while parental investment is known to improve the chances of survival of  
241 young mice. In fact, C57BL/6 females which lost their litters entirely have been found to spend  
242 more time outside the nest and invested less time in building the nest prior to parturition[21], while  
243 the presence of males in cages with breeding females (CD-1) has been demonstrated to increase  
244 pup survival by facilitating maternal behavior[22]. Thus, reduced parental care in cages with more  
245 than one litter can be one of the mechanisms through which pup survivability is reduced in the  
246 presence of an older litter.

247 Most often, when there are two females sharing a cage, they also share the same nest, and younger  
248 lighter pups get clustered together with the older, heavier, and more mobile pups. Data on post-  
249 mortem inspection performed in 324 C57BL/6J pups found dead, by the authors of this study,  
250 revealed that 24% of the pups had some kind of traumatic lesion, including bite wounds and  
251 bruises[23].

252 Higher stocking density leads to increased humidity and gas concentration in the air, with ammonia  
253 reaching above 150 ppm in mouse breeding cages prior to weaning[24,25]. Whereas the impact of  
254 these ammonia levels on newborn mice has not been studied, ammonia levels from 25 to 250 ppm  
255 have been demonstrated to destroy the surface layers of the trachea epithelium lining and increase  
256 the severity of rhinitis, otitis, tracheitis, and pneumonia in rats and mice[25–27]. The gas  
257 concentration problem may be aggravated by the fact that animal care-takers generally tend to  
258 avoid cleaning cages when litters were just born (to avoid pup disturbance).

## 259 **Mother age**

260 Pup death probability increased as Mother Age increased in both collaborators. In this study,  
261 Mother Age and parity were confounded. Thus, it was not possible to distinguish effects on pup

262 death probability of the dam's age and its birthing experience. Decreased productivity and  
263 increased mortality in first-parity litters have been reported for a few different species[28,29], but  
264 for mice this subject remains controversial. While first-parity BALB/c and 129/Sv dams were  
265 reported to wean fewer pups per litter compared to later parity ones[30], we previously found an  
266 increase in pup survival with lower parities[5] in an experimental study conducted in C1, whereas  
267 another study did not find any significant differences in pup loss between first- and later parity  
268 C57BL/6 or BALB/c dams[4].

269 The results for Mother Age are in agreement with those from Tarín et al. (2005)[9], who found  
270 increased pup mortality and incidence of litters with at least one cannibalized pup with increased  
271 parity. Tarín et al. (2005)[9] also compared breeding performance between mothers (F1 of  
272 C57BL/6Jlco × CBA/Jlco) who started their reproductive life at age 70 d (young) and 357 d (old).  
273 The authors found no differences between mother age group on pre-weaning mortality and litter  
274 size both at birth and at weaning, but reported that young mothers produced F2 litters with higher  
275 expectation of survival and body weight than those of old mothers.

## 276 **Number of pups born**

277 Pup death probability was higher in either small or large litters (less than four or more than 11  
278 pups born). The reduced survivability in small litters is in agreement with previous reports for  
279 C57BL/6[5] and F1 hybrid (C57BL/6Jlco × CBA/Jlco) mice[9]. This may be related to the amount  
280 of parental care. Ehret and Bernecker (1986)[31] demonstrated that early pup vocalization, which  
281 gradually increases in frequency after birth, is essential to maintain maternal attention at high  
282 levels, which leads to improved pup weight gain, as compared to pups from mothers which were  
283 unable to hear them. Therefore, it is possible that a small newly born litter does not emit sufficient  
284 vocal cues to ensure sufficient maternal care. Rat litters[32] with one single pup were found to



285 perform only about 10% and 5% of the suckling stimuli performed by litters of 10 and 22 pups.  
286 As a consequence, the milk yield of dams (estimated based on adjusted measures of the pups' daily  
287 weight gain) raising single pups was only -0.4% to 7.0% of those raising 10 pups, which led one-  
288 pup litters to have the lowest growth rate. More than half of the one-pup litters did not show any  
289 weight gain in the first five days pp. From an evolutionary perspective, a small litter is less worth  
290 investing in than a larger litter: Maestriperi and Alleva (1991) [33] demonstrated that CD-1 dams  
291 of large litters (eight pups) spent more than twice as much time displaying litter defense behaviors  
292 against intruder males than dams of small litters (four pups). The increase in pup death probability  
293 found in litters of 12 pups and above, on the other hand, may be a result of increased sibling  
294 competition for access to milk, as discussed above, and also may represent a ceiling in milk  
295 production capacity by the mothers[20,34,35].

## 296 **Weekday and season**

297 In both collaborators, there seemed to be a decrease the probability of pup death towards the end  
298 of the week, possibly associated with the timing of cage changes, a management routine which  
299 affects the mice as well as the accuracy of mortality detection. In C1, which provided records on  
300 cage cleaning dates, these closely mirrored the pattern of pup death probability. To reliably count  
301 the number of pups, the cage must be opened and animals moved, something that often only  
302 happens at cage cleaning when manipulation is unavoidable. Mortality is therefore likely to be  
303 more accurately detected for litters born on cage changing days. For example, an eight-pup litter  
304 born on a Tuesday with cage cleaning schedule for the same day will be recorded as an eight-pup  
305 litter. If two of these pups die in the following 24 hours, this litter's pre-weaning mortality will be  
306 recorded as being 25% at weaning. A similar litter born on a Saturday with two pups dying on

307 Sunday, and subsequently cannibalized, will be recorded at the Tuesday cage change as a litter  
308 with six pups born with no pre-weaning deaths.  
309 Still, the mouse disturbance hypothesis cannot be disregarded. If pup mortality is affected by cage  
310 change, the same pattern would be expected in cage change frequency as in pup death probability  
311 per Weekday (of birth). Reeb-Whitaker et al. (2000)[1] found a higher pup mortality in cages with  
312 weekly changes than those changed once every two weeks. Cage change requires that mice are  
313 moved from the dirty to a clean cage, an event that triggers a stress response evidenced by increases  
314 in serum corticosterone[36] and general activity[37]. It is possible, therefore, that cage change  
315 interferes with parental behavior in breeding cages, which could aggravate pup mortality around  
316 those days.

## 317 **Conclusions**

318 The present study revealed that high pre-weaning mortality in laboratory mice (C57BL/6) is  
319 associated with advanced mother age, litter overlap, the presence of a high number and age of  
320 older siblings in the cage, and a small (less than four) or large (more than 11 pups) litter. The  
321 dynamics of parental care, sibling competition for access to milk, and issues related with the  
322 number of animals in the cage may underlie the effects found in pup mortality caused by the  
323 identified risks. Future studies should address sibling competition and parental behavior in  
324 asynchronous litters.

## 325 **Acknowledgements**

326 Dr. Luiz Henrique Antunes Rodrigues for providing technical input for the statistical modeling  
327 process. The Babraham Institute and the Wellcome Sanger Institute, UK, for providing the  
328 historical data used in this manuscript. Dr. Sofia Lamas for providing technical and scientific input.

## 329 **References**

- 330 1. Reeb-Whitaker CK, Paigen B, Beamer WG, Bronson RT, Churshill GA, Schweitzer IB, et  
331 al. The impact of reduced frequency of cage changes on the health of mice housed in  
332 ventilated cages. *Lab Anim.* 2001;35:58–73.
- 333 2. Inglis CA, Campbell ER, Auciello SL, Sarawar SR. Effects of Enrichment Devices on  
334 Stress-Related Problems in Mouse Breeding. *Johns Hopkins Cent Altern to Anim Test Final*  
335 *Rep Anim Welf Enhanc Award* 2004. 2004;(1):1–9.
- 336 3. Russell WMS, Burch RL. *The principles of humane experimental technique.* Methuen;  
337 1959.
- 338 4. Weber EM, Algers B, Wurbel H, Hultgren J, Olsson IAS. Influence of Strain and Parity on  
339 the Risk of Litter Loss in Laboratory Mice. *Reprod Dom Anim.* 2013;48:292–6.
- 340 5. Brajon S, Morello GM, Teixeira MS, Hultgren J, Gilbert C, Olsson IAS. Social environment  
341 as a cause of litter loss in laboratory mouse : A behavioural study. *Appl Anim Behav Sci.*  
342 2019;218:104827.
- 343 6. Morello GM, Brajon S, Capas-Peneda S, Hultgren J, Ferreira JM, Gilbert C, et al.  
344 Understanding pup mortality in laboratory mouse breeding: How the presence of an older  
345 litter in the cage aggravates pre-weaning mortality in mice housed in trios and in pairs. 2019  
346 Jul 3 [cited 2020 February 23rd]. In *UFAW International Animal Welfare Sc. Symp*  
347 Available from [https://www.ufaw.org.uk/downloads/bruges-2019---ufaw-symposium-](https://www.ufaw.org.uk/downloads/bruges-2019---ufaw-symposium-programme-booklet-online-v1.pdf)  
348 [programme-booklet-online-v1.pdf](https://www.ufaw.org.uk/downloads/bruges-2019---ufaw-symposium-programme-booklet-online-v1.pdf).
- 349 7. European Commission. 2019 report on the statistics on the use of animals for scientific  
350 purposes in the member states of the European Union in 2015-2017. 2020 Feb 5 [Cited 2020  
351 Feb 23]. Brussels. Available from: <https://eur-lex.europa.eu/legal-content/EN/>.

- 352 8. The European Parliament and the Council of 22 September 2010. 2010 Sep 22 [Cited 2020  
353 Feb 23]. Directive 2010/63/EU on the Protection of Animals Used for Scientific Purposes.  
354 Brussels. Available from: <https://eur-lex.europa.eu/homepage.html>.
- 355 9. Tarín JJ, Gómez-Piquer V, Rausell F, Navarro S, Hermenegildo C, Cano A. Delayed  
356 motherhood decreases life expectancy of mouse offspring. *Biol Reprod.* 2005;72(6):1336–  
357 43.
- 358 10. Potgieter FJ, Wilke PI. Effect of different bedding materials on the reproductive  
359 performance of mice. *J S Afr Vet Assoc.* 1997;68(1):8–15.
- 360 11. Eskola S, Kaliste-korhonen E. Nesting material and number of females per cage : effects on  
361 mouse productivity in BALB/c, C57BL/6J, DBA/2 and NIH/S mice. *Lab Anim.*  
362 1999;33:122–8.
- 363 12. Paul MJ, Tuthill C, Kauffman AS, Zucker I. Pelage insulation, litter size, and ambient  
364 temperature impact maternal energy intake and offspring development during lactation.  
365 *Physiol Behav.* 2010;100:128–34.
- 366 13. Gaskill BN, Winnicker C, Garner JP, Pritchett-corning KR. The naked truth: Breeding  
367 performance in nude mice with and without nesting material. *Appl Anim Behav Sci.*  
368 2013;143(2–4):110–6.
- 369 14. Wasson K. Retrospective analysis of reproductive performance of pair-bred compared with  
370 trio-bred mice. *J Am Assoc Lab Anim Sci.* 2017;56(2):190–3.
- 371 15. Mouse phenome database at the Jackson Laboratory. Phenotype measure: Jax5  
372 wean\_born\_ration. [Cited 2020 Feb 23]. Bar Harbor. Available from:  
373 <https://phenome.jax.org/measures/31406>.
- 374 16. Murray SA, Morgan JL, Kane C, Sharma Y, Heffner CS, Lake J, et al. Mouse gestation

- 375 length is genetically determined. PLoS One. 2010 Aug;5(8):e12418.
- 376 17. Schmidt J, Kosztolányi A, Tökölyi J, Hügecz B, Illés I, Király R, et al. Reproductive  
377 asynchrony and infanticide in house mice breeding communally. Anim Behav.  
378 2015;101:201–11.
- 379 18. Stahl W, Kaneda Y. Cerebral Anomalies in Congenital Murine Toxoplasmosis: A  
380 Preliminary Report. Tokai J Exp Clin Med. 1999;23(6):261–5.
- 381 19. Weber EM, Algers B, Hultgren J, Olsson IAS. Pup mortality in laboratory mice--infanticide  
382 or not? Acta Vet Scand. 2013;55(1):83.
- 383 20. König B, Riester J, Markl H. Maternal care in house mice (*Mus musculus*): II. The energy  
384 cost of lactation as a function of litter size. J Zool. 1988;216:195–210.
- 385 21. Weber EM, Hultgren J, Algers B, Olsson IAS. Do laboratory mouse females that lose their  
386 litters behave differently around parturition? PLoS One. 2016 Aug;11(8):e0161238.
- 387 22. Wright SL, Brown RE. Maternal behavior, paternal behavior, and pup survival in CD-1  
388 albino mice (*Mus musculus*) in three different housing conditions. J Comp Psychol.  
389 2000;114(2):183–92.
- 390 23. Capas-Peneda S, Morello GM, Lamas S, Olsson IAS, Gilbert C. Causes of death in newborn  
391 C57BL/6 mice. 2020; Preprint in BioRxiv.
- 392 24. Eveleigh JR. Murine cage density: Cage ammonia levels during the reproductive  
393 performance of an inbred strain and two outbred stocks of monogamous breeding pairs of  
394 mice. Lab Anim. 1993;27(2):156–60.
- 395 25. Gamble MR, Clough G. Ammonia build-up in animal boxes and its effect on rat tracheal  
396 epithelium. Lab Anim. 1976;10(2):93–104.
- 397 26. Broderson JR, Lindsey JR, Crawford JE. The role of environmental ammonia in respiratory

- 398 mycoplasmosis of rats. *Am J Pathol.* 1976;85(1):115–30.
- 399 27. Vogelweid CM, Zapien KA, Honigford MJ, Li L, Li H, Marshall H. Effects of a 28-day  
400 cage-change interval on intracage ammonia levels, nasal histology, and perceived welfare  
401 of CD1 mice. *J Am Assoc Lab Anim Sci.* 2011;50(6):868–78.
- 402 28. Gourdine JL, Bidanel JP, Noblet J, Renaudeau D. Effects of season and breed on the feeding  
403 behavior of multiparous lactating sows in a tropical humid climate. *J Anim Sci.*  
404 2006;84:469–80.
- 405 29. Dhakal K, Maltecca C, Cassady JP, Baloche G, Williams CM, Washburn SP. Calf birth  
406 weight, gestation length, calving ease, and neonatal calf mortality in Holstein, Jersey, and  
407 crossbred cows in a pasture system. *J Dairy Sci.* 2013;96(1):690–8.
- 408 30. Whitaker JW, Moy SS, Pritchett-Corning KR, Fletcher CA. Effects of enrichment and litter  
409 parity on reproductive performance and behavior in BALB/c and 129/Sv mice. *J Am Assoc*  
410 *Lab Anim Sci.* 2016;55(4):387–99.
- 411 31. Ehret G, Bernecker C. Low-frequency sound communication by mouse pups (*Mus*  
412 *musculus*): Wriggling calls release maternal behaviour. *Anim Behav.* 1986;34:821–30.
- 413 32. Russell JA. Milk yield, suckling behavior and milk ejection in the lactating rat nursing litters  
414 of different sizes. *J Physiol.* 1980;303(1):403–15.
- 415 33. Maestriperi D, Alleva E. Litter defence and parental investment allocation in house mice.  
416 *Behav Processes.* 1991;23(3):223–30.
- 417 34. Johnson MS, Thomson SC, Speakman JR. Limits to sustained energy intake: I. Lactation in  
418 the laboratory mouse *Mus musculus*. *J Exp Biol.* 2001;204:1925–35.
- 419 35. Vaanholt LM, Duah OA, Balduci S, Mitchell SE, Hambly C, Speakman JR. Limits to  
420 sustained energy intake. XXVII. Trade-offs between first and second litters in lactating mice

- 421 support the ecological context hypothesis. *J Exp Biol.* 2018;221(5).
- 422 36. Rasmussen S, Miller MM, Filipski SB, Tolwani RJ. Cage change influences serum  
423 corticosterone and anxiety-like behaviors in the mouse. *J Am Assoc Lab Anim Sci*  
424 *JAALAS.* 2011;50(4):479–83.
- 425 37. Castelhana-Carlos MJ, Baumans V. The impact of light , noise , cage cleaning and in-house  
426 transport on welfare and stress of laboratory rats. *Lab Anim.* 2016;43:311–27.

## 427 Supporting information

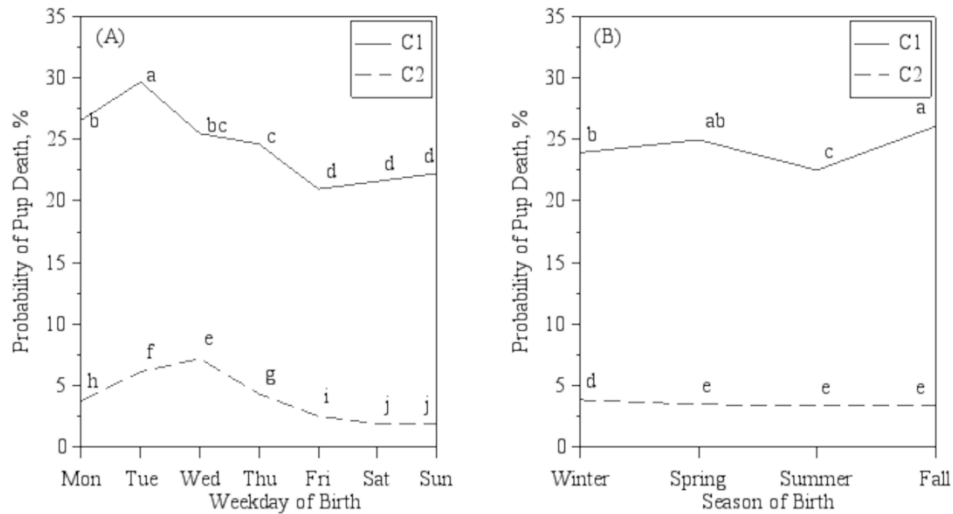

- 428
- 429 **S1 Fig. Probability of pup death by Weekday and Season.** Predicted Probability (least-square  
430 means) of a pup to die as a function of (A) Weekday and (B) Season of birth at C1, the Babraham  
431 Institute, and C2, the Wellcome Sanger Institute. Data points with distinct labeled letters indicate  
432 statistical difference at 95% confidence level. Probability of a pup to die is depicted in terms of  
433 least-square means.

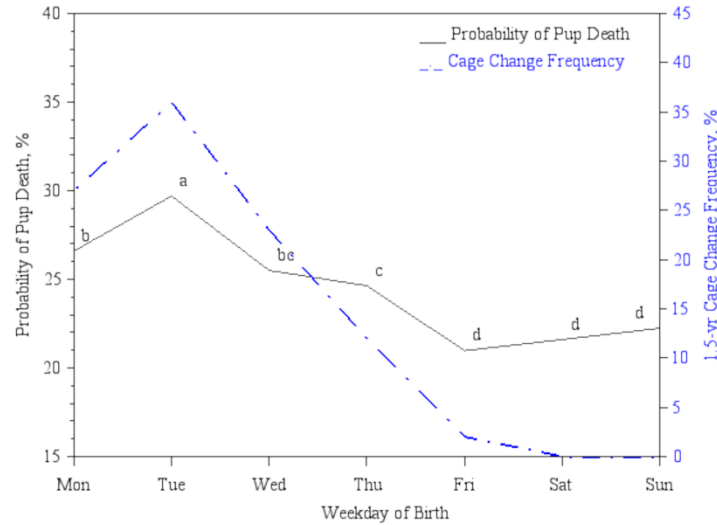

434

435 **S2 Fig. Cage change frequency and probability of pup death by Weekday.** Cage change

436 frequency and predicted probability (least-square means) of a pup to die as a function of Weekday

437 at C1, the Babraham Institute. Data points with distinct labeled letters indicate statistical difference

438 at 95% confidence level. Cage change frequency is depicted as the percentage per weekday of the

439 78 cage change episodes which happened from April 2018 to November 2019 (available data

440 records), in the studied room of C1.

441 **S1 Table. Solutions for fixed effects of the model predicting the odds of pup death fitted in**

442 **the whole processed dataset.**

| Effect                 | Estimate | Standard Error | t Value | Pr >  t |
|------------------------|----------|----------------|---------|---------|
| <b>Intercept</b>       | -1.0546  | 0.0751         | -14.04  | <0.0001 |
| <b>Collaborator C1</b> | 2.3067   | 0.1011         | 22.81   | <0.0001 |
| <b>Collaborator C2</b> | 0.0000   | n.a.           | n.a.    | n.a.    |
| <b>Season Fall</b>     | -0.1468  | 0.0354         | -4.14   | <0.0001 |
| <b>Season Spring</b>   | -0.1082  | 0.0360         | -3.00   | 0.0027  |
| <b>Season Summer</b>   | -0.1234  | 0.0400         | -3.09   | 0.0020  |
| <b>Season Winter</b>   | 0.0000   | n.a.           | n.a.    | n.a.    |
| <b>Weekday 1</b>       | -0.0054  | 0.0517         | -0.11   | 0.9162  |
| <b>Weekday 2</b>       | 0.7230   | 0.0472         | 15.33   | <0.0001 |
| <b>Weekday 3</b>       | 1.2433   | 0.0463         | 26.86   | <0.0001 |
| <b>Weekday 4</b>       | 1.4133   | 0.0453         | 31.18   | <0.0001 |
| <b>Weekday 5</b>       | 0.8705   | 0.0461         | 16.88   | <0.0001 |
| <b>Weekday 6</b>       | 0.3000   | 0.0482         | 6.22    | <0.0001 |



|                                                |         |        |        |         |
|------------------------------------------------|---------|--------|--------|---------|
| <b>Weekday 7</b>                               | 0.0000  | n.a.   | n.a.   | n.a.    |
| <b>Mother Age</b>                              | 0.0046  | 0.0003 | 15.89  | <0.0001 |
| <b>Litter Size<sup>a</sup></b>                 | -0.7104 | 0.0134 | -53.20 | <0.0001 |
| <b>Litter Size<sup>2a</sup></b>                | 0.0345  | 0.0009 | 36.73  | <0.0001 |
| <b>Overlap No</b>                              | -0.4969 | 0.0240 | -20.67 | <0.0001 |
| <b>Overlap Yes</b>                             | 0.0000  | n.a.   | n.a.   | n.a.    |
| <b>Collaborator C1* Season Fall</b>            | 0.2607  | 0.0488 | 5.35   | <0.0001 |
| <b>Collaborator C1* Season Spring</b>          | 0.1647  | 0.0495 | 3.33   | 0.0009  |
| <b>Collaborator C1* Season Summer</b>          | 0.0435  | 0.0541 | 0.80   | 0.4210  |
| <b>Collaborator C1* Season Winter</b>          | 0.0000  | n.a.   | n.a.   | n.a.    |
| <b>Collaborator C2* Season Fall</b>            | 0.0000  | n.a.   | n.a.   | n.a.    |
| <b>Collaborator C2* Season Spring</b>          | 0.0000  | n.a.   | n.a.   | n.a.    |
| <b>Collaborator C2* Season Summer</b>          | 0.0000  | n.a.   | n.a.   | n.a.    |
| <b>Collaborator C2* Season Winter</b>          | 0.0000  | n.a.   | n.a.   | n.a.    |
| <b>Collaborator C1* Weekday Sunday</b>         | 0.04295 | 0.0683 | 0.63   | 0.5292  |
| <b>Collaborator C1* Weekday Monday</b>         | -0.4495 | 0.0639 | -7.04  | <0.0001 |
| <b>Collaborator C1* Weekday Tuesday</b>        | -0.8161 | 0.0637 | -12.81 | <0.0001 |
| <b>Collaborator C1* Weekday Wednesday</b>      | -1.1965 | 0.0626 | -19.11 | <0.0001 |
| <b>Collaborator C1* Weekday Thursday</b>       | -0.6996 | 0.0632 | -11.06 | <0.0001 |
| <b>Collaborator C1* Weekday Friday</b>         | -0.3375 | 0.0648 | -5.21  | <0.0001 |
| <b>Collaborator C1* Weekday Saturday</b>       | 0.0000  | n.a.   | n.a.   | n.a.    |
| <b>Collaborator C2* Weekday Sunday</b>         | 0.0000  | n.a.   | n.a.   | n.a.    |
| <b>Collaborator C2* Weekday Monday</b>         | 0.0000  | n.a.   | n.a.   | n.a.    |
| <b>Collaborator C2* Weekday Tuesday</b>        | 0.0000  | n.a.   | n.a.   | n.a.    |
| <b>Collaborator C2* Weekday Wednesday</b>      | 0.0000  | n.a.   | n.a.   | n.a.    |
| <b>Collaborator C2* Weekday Thursday</b>       | 0.0000  | n.a.   | n.a.   | n.a.    |
| <b>Collaborator C2* Weekday Friday</b>         | 0.0000  | n.a.   | n.a.   | n.a.    |
| <b>Collaborator C2* Weekday Saturday</b>       | 0.0000  | n.a.   | n.a.   | n.a.    |
| <b>Collaborator C1*Mother Age</b>              | -0.0013 | 0.0003 | -3.81  | 0.0001  |
| <b>Collaborator C2*Mother Age</b>              | 0.0000  | n.a.   | n.a.   | n.a.    |
| <b>Collaborator C1*Litter Size<sup>a</sup></b> | 0.0484  | 0.0066 | 7.37   | <0.0001 |
| <b>Collaborator C2*Litter Size<sup>a</sup></b> | 0.0000  | n.a.   | n.a.   | n.a.    |
| <b>Collaborator C1*Overlap No</b>              | 0.1426  | 0.0332 | 4.30   | <0.0001 |
| <b>Collaborator C1*Overlap Yes</b>             | 0.0000  | n.a.   | n.a.   | n.a.    |
| <b>Collaborator C2*Overlap No</b>              | 0.0000  | n.a.   | n.a.   | n.a.    |
| <b>Collaborator C2*Overlap Yes</b>             | 0.0000  | n.a.   | n.a.   | n.a.    |

**Type III (Partial) Tests of Fixed Effects**

| <b>Effect</b>                   | <b>Num DF</b> | <b>F Value</b> | <b>Pr &gt; F</b> |
|---------------------------------|---------------|----------------|------------------|
| <b>Collaborator</b>             | 1             | 579.79         | <0.0001          |
| <b>Season</b>                   | 3             | 5.84           | 0.0006           |
| <b>Weekday</b>                  | 6             | 256.88         | <0.0001          |
| <b>Mother Age</b>               | 1             | 511.62         | <0.0001          |
| <b>Litter Size<sup>a</sup></b>  | 1             | 2563.59        | <0.0001          |
| <b>Litter Size<sup>2a</sup></b> | 1             | 1349.04        | <0.0001          |

|                                             |   |        |         |
|---------------------------------------------|---|--------|---------|
| <b>Overlap</b>                              | 1 | 658.04 | <0.0001 |
| <b>Collaborator*Season</b>                  | 3 | 13.55  | <0.0001 |
| <b>Collaborator*Weekday</b>                 | 6 | 102.88 | <0.0001 |
| <b>Collaborator*Mother Age</b>              | 1 | 14.48  | 0.0001  |
| <b>Collaborator*Litter Size<sup>a</sup></b> | 1 | 54.30  | <0.0001 |
| <b>Collaborator*Overlap</b>                 | 1 | 18.46  | <0.0001 |

443 n.a.=not applicable.

444 <sup>a</sup>Variable Litter Size was centered by its mean.

445 **S2 Table. Solutions for fixed effects of the model predicting the odds of pup death fitted in**  
 446 **the dataset containing only overlapped litters.**

| <b>Effect</b>                                  | <b>Estimate</b> | <b>Standard Error</b> | <b>t Value</b> | <b>Pr &gt;  t </b> |
|------------------------------------------------|-----------------|-----------------------|----------------|--------------------|
| <b>Intercept</b>                               | -11.5390        | 0.3921                | -29.43         | <0.0001            |
| <b>Collaborator C1</b>                         | -2.2587         | 0.5681                | -3.98          | <0.0001            |
| <b>Collaborator C2</b>                         | 0.0000          | n.a.                  | n.a.           | n.a.               |
| <b>Weekday 1</b>                               | -0.0671         | 0.2256                | -0.30          | 0.7663             |
| <b>Weekday 2</b>                               | 0.5713          | 0.2105                | 2.71           | 0.0066             |
| <b>Weekday 3</b>                               | 1.1023          | 0.2139                | 5.15           | <0.0001            |
| <b>Weekday 4</b>                               | 1.5854          | 0.2116                | 7.49           | <0.0001            |
| <b>Weekday 5</b>                               | 0.3004          | 0.2109                | 1.42           | 0.1544             |
| <b>Weekday 6</b>                               | 0.0120          | 0.2184                | 0.05           | 0.9563             |
| <b>Weekday 7</b>                               | 0.0000          | n.a.                  | n.a.           | n.a.               |
| <b>Season Fall</b>                             | 0.0219          | 0.1584                | 0.14           | 0.8902             |
| <b>Season Spring</b>                           | 0.4246          | 0.1562                | 2.72           | 0.0066             |
| <b>Season Summer</b>                           | 0.4826          | 0.1564                | 3.09           | 0.0020             |
| <b>Season Winter</b>                           | 0.0000          | n.a.                  | n.a.           | n.a.               |
| <b>Mother Age</b>                              | 0.0083          | 0.0012                | 7.25           | <0.0001            |
| <b>Litter Size<sup>a</sup></b>                 | -0.2233         | 0.0228                | -9.78          | <0.0001            |
| <b>Litter Size<sup>2a</sup></b>                | 0.0814          | 0.0055                | 14.80          | <0.0001            |
| <b>Sibling Number</b>                          | 0.02873         | 0.0396                | 0.73           | 0.4676             |
| <b>Sibling Age</b>                             | -0.0143         | 0.0194                | -0.74          | 0.4618             |
| <b>Sibling Number*</b>                         | 0.0181          | 0.0029                | 6.29           | <0.0001            |
| <b>Sibling Age</b>                             |                 |                       |                |                    |
| <b>Collaborator C1*Sibling Age</b>             | 0.5338          | 0.0217                | 24.61          | <0.0001            |
| <b>Collaborator C2*Sibling Age</b>             | 0.0000          | n.a.                  | n.a.           | n.a.               |
| <b>Collaborator C1*Sibling Number</b>          | 0.4587          | 0.0464                | 9.88           | <0.0001            |
| <b>Collaborator C2*Sibling Number</b>          | 0.0000          | n.a.                  | n.a.           | n.a.               |
| <b>Collaborator C1*Litter Size<sup>a</sup></b> | 0.2170          | 0.0502                | 4.33           | <0.0001            |
| <b>Collaborator C2*Litter Size<sup>a</sup></b> | 0.0000          | n.a.                  | n.a.           | n.a.               |
| <b>Collaborator C1* Season Fall</b>            | 0.5386          | 0.3721                | 1.45           | 0.1478             |
| <b>Collaborator C1* Season Spring</b>          | -0.420          | 0.3566                | -0.12          | 0.9063             |
| <b>Collaborator C1* Season Summer</b>          | -0.7081         | 0.3697                | -1.92          | 0.0554             |

|                                           |         |        |       |         |
|-------------------------------------------|---------|--------|-------|---------|
| <b>Collaborator C1* Season Winter</b>     | 0.0000  | n.a.   | n.a.  | n.a.    |
| <b>Collaborator C2* Season Fall</b>       | 0.0000  | n.a.   | n.a.  | n.a.    |
| <b>Collaborator C2* Season Spring</b>     | 0.0000  | n.a.   | n.a.  | n.a.    |
| <b>Collaborator C2* Season Summer</b>     | 0.0000  | n.a.   | n.a.  | n.a.    |
| <b>Collaborator C2* Season Winter</b>     | 0.0000  | n.a.   | n.a.  | n.a.    |
| <b>Collaborator C1* Weekday Sunday</b>    | 0.9696  | 0.5306 | 1.83  | 0.0676  |
| <b>Collaborator C1* Weekday Monday</b>    | -0.7351 | 0.4891 | -1.50 | 0.1328  |
| <b>Collaborator C1* Weekday Tuesday</b>   | -0.4743 | 0.5124 | -0.93 | 0.3546  |
| <b>Collaborator C1* Weekday Wednesday</b> | -2.0820 | 0.4996 | -4.17 | <0.0001 |
| <b>Collaborator C1* Weekday Thursday</b>  | -0.6480 | 0.5063 | -1.28 | 0.2006  |
| <b>Collaborator C1* Weekday Friday</b>    | -0.0665 | 0.5011 | -0.13 | 0.8944  |
| <b>Collaborator C1* Weekday Saturday</b>  | 0.0000  | n.a.   | n.a.  | n.a.    |
| <b>Collaborator C2* Weekday Sunday</b>    | 0.0000  | n.a.   | n.a.  | n.a.    |
| <b>Collaborator C2* Weekday Monday</b>    | 0.0000  | n.a.   | n.a.  | n.a.    |
| <b>Collaborator C2* Weekday Tuesday</b>   | 0.0000  | n.a.   | n.a.  | n.a.    |
| <b>Collaborator C2* Weekday Wednesday</b> | 0.0000  | n.a.   | n.a.  | n.a.    |
| <b>Collaborator C2* Weekday Thursday</b>  | 0.0000  | n.a.   | n.a.  | n.a.    |
| <b>Collaborator C2* Weekday Friday</b>    | 0.0000  | n.a.   | n.a.  | n.a.    |
| <b>Collaborator C2* Weekday Saturday</b>  | 0.0000  | n.a.   | n.a.  | n.a.    |

**Type III (Partial) Tests of Fixed Effects**

| <b>Effect</b>                      | <b>Num DF</b> | <b>F Value</b> | <b>Pr &gt; F</b> |
|------------------------------------|---------------|----------------|------------------|
| <b>Collaborator</b>                | 1             | 47.32          | <0.0001          |
| <b>Weekday</b>                     | 6             | 3.96           | 0.0006           |
| <b>Season</b>                      | 3             | 1.96           | 0.1183           |
| <b>Mother Age</b>                  | 1             | 52.54          | <0.0001          |
| <b>Litter Size<sup>a</sup></b>     | 1             | 17.40          | <0.0001          |
| <b>Litter Size<sup>2a</sup></b>    | 1             | 219.15         | <0.0001          |
| <b>Sibling Number</b>              | 1             | 40.91          | <0.0001          |
| <b>Sibling Age</b>                 | 1             | 135.48         | <0.0001          |
| <b>Sibling Number*</b>             | 1             | 39.61          | <0.0001          |
| <b>Sibling Age</b>                 | 1             | 39.61          | <0.0001          |
| <b>Collaborator*Sibling Age</b>    | 1             | 605.64         | <0.0001          |
| <b>Collaborator*Sibling Number</b> | 1             | 97.59          | <0.0001          |
| <b>Collaborator*Litter Size</b>    | 1             | 18.72          | <0.0001          |
| <b>Collaborator*Season</b>         | 3             | 3.80           | 0.0098           |
| <b>Collaborator*Weekday</b>        | 6             | 7.22           | <0.0001          |

447

448 n.a.=not applicable.

449 <sup>a</sup>Variable Litter Size was centered by its mean.
